# The Effect of Aclydine in Chronic Fatigue Syndrome: A Randomized Controlled Trial

Gerard K. H. The\*, Gijs Bleijenberg, Jos W. M. van der Meer

Department of General Internal Medicine, Nijmegen Expert Centre Chronic Fatigue, Radboud University Nijmegen Medical Centre, Nijmegen, The Netherlands

**Trial Registration:** ISRCTN77271661

**Funding:** This work was supported by Optipharma, Susteren and Planet Vital, Maastricht-Airport, The Netherlands. The funder had no role in study design, data collection, data analysis, interpretation of the data, decision to publish, or preparation of the manuscript.

**Competing Interests:** JWMvdM received grants from Optipharma BV Susteren, The Netherlands and GlaxoSmithKline, The Netherlands, for research on chronic fatigue syndrome.

**Citation:** The GKH, Bleijenberg G, van der Meer JWM (2007) The effect of aclydine in chronic fatigue syndrome: A randomized controlled trial. *PLoS Clin Trials* 2(5): e19. doi:10.1371/journal.pctr.0020019

**Received:** August 29, 2006

**Accepted:** February 26, 2007

**Published:** May 18, 2007

**Copyright:** © 2007 The et al. This is an open-access article distributed under the terms of the Creative Commons Attribution License, which permits unrestricted use, distribution, and reproduction in any medium, provided the original author and source are credited.

**Abbreviations:** CDC, US Centers for Disease Control and Prevention; CI, confidence interval; CFS, chronic fatigue syndrome; CIS-fatigue, Checklist Individual Strength, subscale fatigue severity; DOF, daily observed fatigue; GH, growth hormone; IGF, insulin-like growth factor; IGF1, insulin-like growth factor 1; IGF1 binding protein, SD, standard deviation; SIP-8, Sickness Impact Profile-8

\* To whom correspondence should be addressed. E-mail: g.the@aig.umcn.nl

## ABSTRACT

**Objectives:** It is unclear whether insulin-like growth factor (IGF) function is involved in the pathophysiology of chronic fatigue syndrome (CFS). Unpublished data and reports in patient organization newsletters suggest that Aclydine, a food supplement, could be effective in the treatment of CFS by increasing biologically active IGF1 levels. Here we aimed to measure the IGF1 and IGF binding protein (IGFBP) 3 status of CFS patients compared to age- and gender-matched neighborhood controls, and to assess the effect of Aclydine on fatigue severity, functional impairment, and biologically active IGF1 level (IGFBP3/IGF1 ratio).

**Design:** A randomized, placebo-controlled, double-blind clinical trial.

**Setting:** Radboud University Nijmegen Medical Centre, The Netherlands.

**Participants:** Fifty-seven adult patients who fulfilled the US Centers for Disease Control and Prevention criteria for CFS. IGF status of 22 CFS patients was compared to that of 22 healthy age- and gender-matched neighborhood control individuals.

**Intervention:** Aclydine or placebo for 14 wk.

**Outcome measures:** Outcomes were fatigue severity (Checklist Individual Strength, subscale fatigue severity [CIS-fatigue]), functional impairment (Sickness Impact Profile-8 [SIP-8]), and biologically active IGF1 serum concentrations. Analyses were on an intention-to-treat basis.

**Results:** There was no difference in IGF status in 22 CFS patients compared to healthy age- and gender-matched control individuals. Treatment with Aclydine did not result in significant differences compared with the placebo group on any of the outcome measures: CIS-fatigue +1.1 (95% CI -4.4 to +6.5,  $p = 0.70$ ), SIP-8 +59.1 (95% CI -201.7 to +319.8,  $p = 0.65$ ), and IGF1/IGFBP3 ratio -0.5 (95% CI -2.8 to +1.7,  $p = 0.63$ ).

**Conclusion:** We found no differences in IGF1 status in CFS patients compared to healthy matched neighborhood controls. In addition, the results of this clinical trial do not demonstrate any benefit of Aclydine over placebo in the treatment of CFS.

## Editorial Commentary

**Background:** Chronic fatigue syndrome is a complicated and poorly understood illness. People with the condition experience tiredness that carries on for a long period of time and does not get better with rest. Other symptoms include sleeping problems, muscle and joint pains, concentration difficulties, and headaches. The causes of chronic fatigue syndrome are not known. There is evidence for the effectiveness of certain behavioral interventions, such as exercise therapy and cognitive behavioral therapy, in improving certain symptoms. However, some doctors are concerned that a food supplement called Aclydine, derived from a plant called *Solanum dulcamara*, is being used and promoted as a treatment for chronic fatigue syndrome when there is little evidence about the efficacy or safety of this supplement.

The researchers here carried out a randomized trial in The Netherlands, recruiting adult patients who met the internationally accepted criteria for chronic fatigue syndrome. The participants were allocated by chance to receive either 14 weeks of treatment with Aclydine together with amino acid supplements or, alternatively, placebo versions of the Aclydine and amino acid tablets. The researchers then measured participants' responses with respect to two primary outcome measures. One of these was how tired participants felt, which was measured using a subscale on a questionnaire called the Checklist Individual Strength scale (CIS-fatigue). The other primary outcome measure was "functional impairment," which examines how well someone carries out their daily life, using the Sickness Impact Profile (SIP-8) scale. The secondary outcome measures included physical activity levels, day-to-day fatigue levels, and the levels of insulin-like growth factor 1 (IGF1) in blood, a hormone that's thought by some researchers to be related to the severity of chronic fatigue.

**What the trial shows:** In the trial, 57 people were randomized to receive either Aclydine plus amino acid supplements, or placebo tablets. When comparing scores on the primary outcome measures at the end of the trial, the researchers did not see significant differences between the treatment and placebo groups. Similarly, the results for secondary outcome measures in this trial did not show any significant differences between the treatment and placebo groups.

**Strengths and limitations:** Strengths of this study include the fact that it is one of the few properly designed studies of a product for which claims have been made of effectiveness in chronic fatigue syndrome. The study was designed as a double-blind trial, in which participants and investigators (those collecting the outcome data) did not know whether an individual received Aclydine or placebo. This procedure should help to minimize bias in assessing outcomes. A key limitation of this study is the relatively small number of participants. However, the investigators considered it unlikely that a larger trial would detect a clinically meaningful effect of Aclydine on these outcome measures for patients with chronic fatigue syndrome.

**Contribution to the evidence:** Systematic reviews of interventions for the treatment of chronic fatigue syndrome have found evidence for the efficacy of exercise therapy and cognitive behavioral therapy. This trial shows no evidence of efficacy of Aclydine plus amino acid supplements for the treatment of chronic fatigue.

*The Editorial Commentary is written by PLoS staff, based on the reports of the academic editors and peer reviewers.*

## INTRODUCTION

Chronic fatigue syndrome (CFS) is a medically unexplained syndrome, characterized by severe disabling fatigue for a period of at least 6 mo that has led to considerable impairment in daily functioning [1]. Various accompanying symptoms may be present, such as headache, joint and muscle

pain, sore throat, and impaired memory and concentration. Of the many therapeutic interventions that have been undertaken, so far only cognitive behavioral therapy and graded exercise therapy have met with success [2].

Neuroendocrinological investigations have tried to elucidate the pathophysiology of CFS [3]. As CFS patients and adult patients with a growth hormone (GH) deficiency report similar symptoms such as fatigue, myalgia, a diminished sense of well-being, and reduced physical capacity [4,5] and treatment of GH-deficient adults with GH has measurable effects on physical function and perception of fatigue [6], GH status is a focus of this research. Changes in the GH/insulin-like growth factor (IGF) 1 axis have been reported in CFS and fatigue-related disorders such as fibromyalgia [7]. IGF1 studies in CFS patients have yielded conflicting results: low [8,9], normal [10,11], and increased [12] basal IGF1 levels have been found. Sample size, selection of controls, appropriateness of matching, and selection of CFS patients with psychiatric co-morbidity could explain the conflicting results.

Despite the conflicting publications concerning IGF1 status in CFS patients, in recent years there have been reports in patient organization newsletters that a new food supplement called Aclydine could be an effective treatment for CFS. The active ingredient of Aclydine is an alkaloid from *Solanum dulcamara*. It has been claimed that Aclydine is effective because it increases IGF1 concentrations in CFS patients by stimulating GH releasing hormone and, consequently, GH secretion. GH is converted to IGF1 in the liver. IGF1 activates tyrosine kinase and integrin receptors and stimulates intracellular lipid and glycogen synthesis.

Levels of IGF binding proteins (IGFBPs), particularly IGFBP3, modulate the biological activity of IGF1, and the ratio of IGFBP3 to IGF1 reflects IGF1 biological activity [13]. There are unpublished observations suggesting that Aclydine could increase the IGF1 plasma concentrations in healthy humans and in CFS patients. An 8-wk controlled trial with Aclydine in combination with amino acid supplementation in 90 CFS patients has been reported to have a positive effect [14].

However, there are, to our knowledge, no published peer-reviewed studies investigating the effect of Aclydine. Double-blind randomized controlled trials are needed, for several reasons. First, this food supplement is available on the Internet without prescription and is thus easily accessible. Second, although the effects of Aclydine treatment have not been evaluated thoroughly, there are ongoing studies in other vulnerable patient categories, such as in cancer patients with chronic fatigue after treatment, but these studies are not listed in the international controlled trial registry Current Controlled Trials (<http://www.controlled-trials.com>).

For the reasons given above, we assessed the IGFBP3/IGF1 status in patients fulfilling the US Centers for Disease Control and Prevention (CDC) criteria for CFS [1] and in healthy gender- and age-matched neighborhood controls, to evaluate whether there are intrinsic differences in IGFBP3/IGF1 status between the two groups. Furthermore, we investigated the effect of Aclydine on IGF1 concentration, IGFBP3/IGF1 ratio, and CFS-related symptoms in a well-defined CFS population using validated outcome measures and a randomized double-blind placebo-controlled design.

## METHODS

The study was approved by the medical ethical committee of the Radboud University Nijmegen Medical Centre. Written informed consent was obtained from all participants prior to enrollment.

### Participants

Patients were recruited through the outpatient clinic of the Department of General Internal Medicine of the Radboud University Nijmegen Medical Centre and through an advertisement in the newsletter of the Dutch CFS patient organization ME-Stichting (<http://www.me-cvs-stichting.nl>). Patients were eligible for participation if they fulfilled the following inclusion criteria: they had to be between 18 and 65 y of age, and they had to fulfill the CDC consensus criteria for CFS [1]. A Structured Clinical Interview for DSM-IV (SCID-1) was performed to exclude patients with current psychiatric co-morbidity and to ensure a homogeneous group of patients.

Pregnant or lactating women were excluded, as were patients with lactose intolerance and patients taking psychotropic drugs or experimental medications.

An additional criterion to be met was an IGF1/IGFBP3 ratio greater than 2.5. We asked patients who could potentially participate in the trial, if possible, to bring a healthy neighborhood control individual of similar age, gender, body weight, and body height, to compare IGF status. Except for contraceptives, the control individuals were not allowed to take medication.

### Interventions

Aclydine and an identical placebo were delivered by the manufacturer Optipharma. Each Aclydine capsule contained 250 mg of the alkaloid. Patients took a single daily dose on an empty stomach, with the following decreasing Aclydine dosage schedule over a total of 14 wk: weeks 1–2, 1,000 mg per day; weeks 3–6, 750 mg per day; weeks 7–8, 500 mg per day; weeks 9–10, 500 mg every 2 d; weeks 11–12, 250 mg per day; and weeks 13–14, 250 mg every 2 d.

Aclydine treatment was combined with amino acid supplements to provide sufficient essential and nonessential amino acid intake during treatment. Patients in the placebo group received placebo Aclydine and placebo amino acid supplements.

There was no difference in taste, appearance, or packaging between the active supplements and the placebo capsules.

### Design and Procedures

The study was a prospective, randomized, double-blind, placebo-controlled trial. The effect of Aclydine was assessed by pre- and post-trial testing. Post-trial testing was performed at the end of the 14-wk treatment period. During the post-trial assessments, the patients were still taking the trial supplements. All participants, investigators, and laboratory technicians were blinded to the treatment condition. IGF1 and IGF1/IGFBP3 measurements were also done in a blinded fashion.

### Randomization

Before the start of the clinical trial, the pharmacy of the hospital prepared 57 treatment packages. Randomization and allocation to the treatment or placebo group was based on a patient's study number. After acceptance of a patient by the

junior researcher (G. K. H. T.) and the clinical psychologist (G. B.), the eligible patient received the lowest study number available (1–57). The pharmacy held the randomization list that correlated the study number with the treatment group. To maintain balance over time, the concealed randomization was done in blocks of ten. Treatments were generated randomly within the blocks using a computer program (Excel, Microsoft, <http://www.microsoft.com>).

### Primary Outcome Measures

**Fatigue severity.** The Checklist Individual Strength is a reliable and validated self-report questionnaire. We used the Checklist Individual Strength, subscale fatigue severity (CIS-fatigue) [15,16]. The score on this eight-item scale ranges from eight (no fatigue) to 56 (maximally fatigued). The cut-off point was set at 35 [17].

**Functional impairment.** The Sickness Impact Profile-8 (SIP-8) measures the influence of symptoms on daily functioning, using the following eight subscales to rate both physical and psychological disability: home management, mobility, alertness behavior, sleep/rest, ambulation, social interactions, work, and recreation and pastimes [18,19]. CFS patients with substantial functional impairments were included. Patients with scores above the cut-off point of 800 were included.

### Secondary Outcome Measures

**Activity level.** Besides self-reported outcome measures, we measured physical activity with an actometer. An actometer is a small motion-sensing device attached to the ankle; it was worn continuously for 14 d during the assessment periods. After the 2-wk period, the average score over 12 d was computed [20].

**Daily fatigue level.** During the 2-wk actometer period, patients rated their fatigue level in a complaint diary. They rated their level of fatigue four times a day on a zero (no fatigue) to four (maximally fatigued) scale. The four scores for each day were summed to produce the daily observed fatigue (DOF) score, which ranged from 0 to 16 [21]. The mean of 12 consecutive DOF scores was used.

### Blood Samples

Blood samples of the patients and the matched neighborhood controls were taken at the same time, and the paired blinded samples were handled in an identical fashion. Serum IGF1 was measured by an immune radiometric assay (Diagnostic Systems Laboratories, <http://www.dslabs.com>). For IGF1, the inter- and intra-assay coefficients of variation were 6.25% and 4.93%, respectively. IGF1/IGFBP3 was also assessed by an immune radiometric assay (Immulate, DPC, <http://dpcweb.com>). For IGF1/IGFBP3, the inter- and intra-assay coefficients of variation were 4.25% and 1.3%, respectively.

### Statistical Methods

For all analyses SPSS 12.01 (SPSS, <http://www.spss.com>) was used.

Power calculations before the start of the trial showed that 22 persons were needed in each group to detect a difference of at least one standard deviation (SD) on the CIS-fatigue with a power of 90% and a two-tailed significance level of 5%. Anticipating a dropout rate of 10%, at least 49 persons needed to be recruited. Analyses were performed on an intention-to-treat basis.

**Table 1.** Hormonal Blood Levels

| Hormone           | Patients (n = 22) |              | Controls (n = 22) |              | p-Value (95% CI)     |
|-------------------|-------------------|--------------|-------------------|--------------|----------------------|
|                   | Mean (SD)         | Range (nm/l) | Mean (SD)         | Range (nm/l) |                      |
| IGF1 (nm/l)       | 37.0 (19.7)       | 18.6–96.1    | 36.9 (14.1)       | 18.6–76.1    | 0.98 (–10.3 to 10.6) |
| IGFBP3 (nm/l)     | 117.6 (60.1)      | 51.1–224.7   | 114.5 ( 54.7)     | 56.0–240.8   | 0.86 (–31.8 to 38.1) |
| Ratio IGFBP3/IGF1 | 3.7 (2.3)         | 0.89–9.24    | 3.5 (2.3)         | 1.37–9.84    | 0.82 (–1.2 to 1.5)   |

doi:10.1371/journal.pctr.0020019.t001

Missing values were replaced by way of the last observation carried forward. Independent sample *t*-tests were performed on the change scores, defined as the difference between baseline scores and the post-treatment scores after 14 wk.

IGF data are given as mean ± SD. The hormonal measurements were analyzed by independent sample *t*-test.

**RESULTS**

All patients were recruited between February 2003 and April 2005.

In total, 22 patients were able to bring a neighborhood control individual (four men and 18 women). The results of the hormonal assessments are shown in Table 1. Hormonal values including the CFS patients of the outpatient clinic and

patients who did not meet the hormonal inclusion criteria for participation in the clinical trial are reported.

No significant differences were found in the IGF status of the CFS patients versus the controls.

Figure 1 illustrates participant flow through the trial. In total, 112 patients were given information about the study protocol; 31 persons refused to participate, and the main reason given for refusal was the intensity of the study. Data obtained from 26 of the 31 persons who chose not to participate showed no significant difference in age, number of CDC symptoms, fatigue severity, or functional impairment between the CFS patients participating in the clinical trial and those who chose not to participate (data not shown). Twenty-four patients did not meet the inclusion criteria. A total of 57 patients were randomized in the clinical trial: 15 patients were recruited from the outpatient clinic, and 42

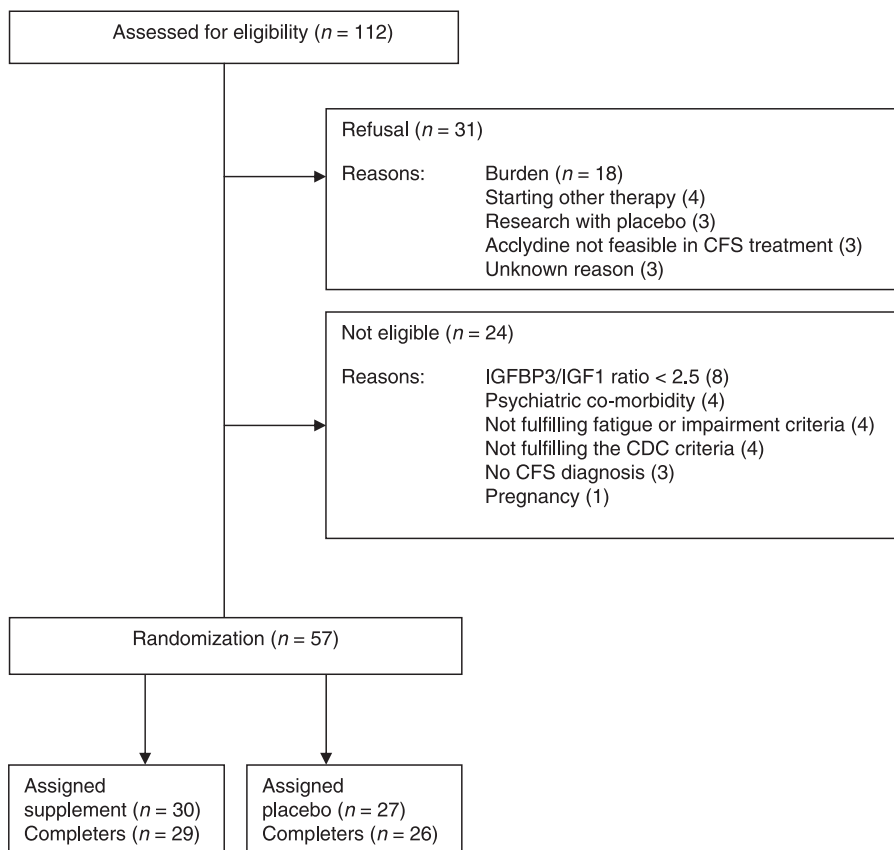

**Figure 1.** CONSORT Flowchart

doi:10.1371/journal.pctr.0020019.g001

**Table 2.** Patient Characteristics

| Characteristic | Aclydine Group<br>(n = 30) | Placebo Group<br>(n = 27) |
|----------------|----------------------------|---------------------------|
| Age, years     | 40.9 (9.4)                 | 43.4 (11.2)               |
| Female         | 77%                        | 59%                       |
| CIS-fatigue    | 46.5 (7.4)                 | 46.2 (7.9)                |
| SIP-8          | 1,484 (520.4)              | 1,317 (481.7)             |
| CDC symptoms   | 7.6 (1.4)                  | 7.5 (1.3)                 |

Values are mean (SD), except for gender, which is given as percent female.  
doi:10.1371/journal.pctr.0020019.t002

patients came in response to the advertisement in the patient organization newsletter. One patient in each arm dropped out after randomization, and as a consequence, in each arm, baseline data for one patient was carried forward, and a sensitivity analysis was not required. The Aclydine and placebo treatments were well tolerated. No important side effects were reported in either group. The Aclydine and placebo groups did not differ with respect to age, gender, fatigue severity, impairment, or number of CDC symptoms (Table 2).

### Primary Outcomes

No significant differences in change scores were found between the treatment and placebo groups on the primary outcome measures (Table 3). The CFS patients treated with Aclydine did not show a significant decrease in fatigue severity (CIS-fatigue +1.1 [95% CI -4.4 to +6.5,  $p = 0.70$ ]) or functional impairment (SIP-8 +59.1 [95% CI -201.7 to +319.8,  $p = 0.65$ ]) compared to the placebo group.

### Secondary Outcomes

Actometer activity scores did not show significant differences between the two groups. Analysis of fatigue severity rated with the DOF did not show significant differences either.

No significant differences were found between the treatment and placebo groups in IGF1 blood level, IGF1/IGFBP3 blood

level, or IGF1/IGFBP3 ratio at baseline; after 4, 8, or 14 wk of treatment; or during follow-up (Figure 2).

## DISCUSSION

### Interpretation

In this randomized controlled blinded clinical trial, no therapeutic effect of Aclydine in CFS was found. In this study we also addressed the issue of a deficiency of bioactive IGF1. To control for unwanted stress effects and other confounders, the blood samples were taken simultaneously from the patients and their matched neighborhood controls. For each pair of patient and control, the measurements of IGF1 and IGF1/IGFBP3 were performed in the same run. In addition, we detected no differences in IGF1 or IGF1/IGFBP3 concentrations in CFS patients without psychiatric co-morbidity versus closely matched healthy neighborhood controls.

Although the sample size is relatively small, the results do not point to a different IGF1/IGFBP3 status in CFS patients compared to controls. These results do not support the hypothesis that changes in IGF1 and IGF1/IGFBP3 metabolism are involved in the pathophysiology of CFS.

### Generalizability

In this study we enrolled a representative sample of adult referred and non-referred CFS patients who fulfilled the international CDC consensus criteria for CFS [1]. In contrast to previous intervention studies with cognitive behavioral therapy [22] or with a polynutrient supplement [23] conducted by our research group, we excluded patients with psychiatric co-morbidity to exclude hormonal influences caused by current psychiatric co-morbidity. The mean fatigue severity and functional impairment scores in this study represent high fatigue severity levels and high functional impairment in the CFS patients. Compared to the previously mentioned intervention studies, the patients in this clinical trial reported slightly lower fatigue and functional impairment scores. Selection of CFS patients without current psychiatric co-morbidity could explain this difference.

**Table 3.** Treatment Effect

| Outcomes  | Evaluation        | Group <sup>a</sup> | Baseline <sup>b</sup> | At 14 wk <sup>b</sup> | Treatment Effect (95% CI) | p-Value |
|-----------|-------------------|--------------------|-----------------------|-----------------------|---------------------------|---------|
| Primary   | CIS-fatigue       | Aclydine           | 46.5 (7.4)            | 42.4 (11.6)           | 1.1 (-4.4 to 6.5)         | 0.70    |
|           |                   | Placebo            | 46.2 (7.9)            | 43.0 (12.6)           |                           |         |
|           | SIP-8             | Aclydine           | 1,484.0 (520.4)       | 1,228.1 (619.7)       | 59.1 (-201.7 to 319.8)    | 0.65    |
|           |                   | Placebo            | 1,317.0 (481.7)       | 1,120.2 (543.0)       |                           |         |
| Secondary | Actometer         | Aclydine           | 60.8 (20.5)           | 64.9 (23.4)           | 4.1 (-5.9 to 14.0)        | 0.42    |
|           |                   | Placebo            | 64.8 (25.2)           | 64.9 (23.5)           |                           |         |
|           | DOF               | Aclydine           | 8.6 (2.3)             | 8.0 (2.8)             | -0.2 (-1.2 to 0.9)        | 0.76    |
|           |                   | Placebo            | 7.7 (2.2)             | 7.0 (2.6)             |                           |         |
|           | IGF1              | Aclydine           | 43.2 (32.1)           | 37.7 (22.0)           | -4.6 (-17.7 to 8.6)       | 0.49    |
|           |                   | Placebo            | 37.3 (18.0)           | 36.3 (18.8)           |                           |         |
|           | IGFBP3            | Aclydine           | 163.4 (34.1)          | 160.6 (32.9)          | -1.7 (-17.5 to 14.0)      | 0.83    |
|           |                   | Placebo            | 168.9 (39.6)          | 164.3 (29.5)          |                           |         |
|           | IGFBP3/IGF1 ratio | Aclydine           | 5.3 (3.7)             | 5.7 (3.2)             | -0.5 (-2.8 to 1.7)        | 0.63    |
|           |                   | Placebo            | 5.6 (3.1)             | 5.4 (2.1)             |                           |         |

<sup>a</sup>Aclydine group, n = 30; placebo group, n = 27.

<sup>b</sup>Values are mean (SD).

A decline in CIS-fatigue, SIP-8, DOF scores, IGF1/IGFBP3 scores or the IGF1/IGFBP3/IGF1 ratio is considered a positive outcome, i.e., an improvement. A decline in actometer, IGF1, is considered a negative outcome. The treatment effect is considered positive when the improvement in the Aclydine group is larger than that of the placebo group.

doi:10.1371/journal.pctr.0020019.t003

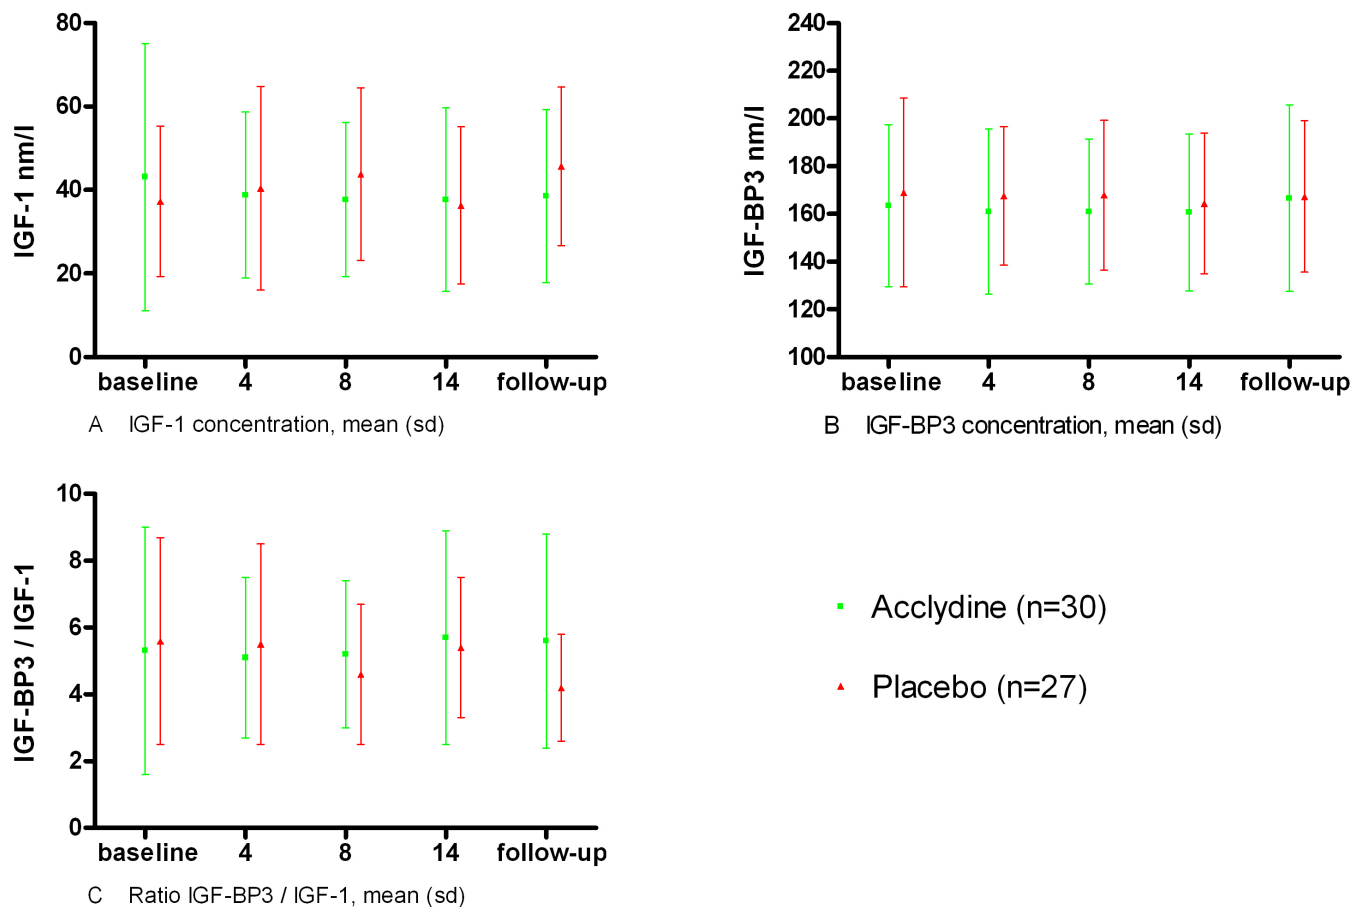

**Figure 2.** Hormone Data of the Two Treatment Groups

(A) IGF1 concentration.  
 (B) IGFBP3 concentration.  
 (C) IGFBP3/IGF1 ratio.  
 doi:10.1371/journal.pctr.0020019.g002

## Overall Evidence

To our knowledge, this is the first published report of a randomized controlled trial evaluating the effect of the food supplement Aclydyne in CFS patients. The effect was assessed by pre- and post-trial testing with validated instruments designed to assess different dimensions of CFS as well as treatment effects. Treatment with Aclydyne was not more effective than placebo in changing self-reported outcome measures, hormonal blood levels, or physical activity.

The lack of significant differences on any of the dimensions of fatigue or the hormonal assessments strengthens our overall findings.

Previous unpublished studies by others on file at the manufacturer claimed that treatment with Aclydyne would be more effective in CFS patients with a higher IGFBP3/IGF1 ratio. Based on this claim, we did a subset analysis for patients with a ratio greater than 4.5:19 CFS patients in the Aclydyne group and 20 in the placebo group had a ratio greater than 4.5. No significant differences in change scores were seen between the subgroups in any of the outcome measures.

A second claim was that Aclydyne treatment works by increasing biologically active IGF1. However, assessment of IGF1 concentration and IGFBP3/IGF1 values in the Aclydyne

group at baseline, 4 wk, and 8 wk during treatment, at the end of treatment, and at follow-up (1 mo after the treatment period) did not show a significant change.

The power of our study was sufficient to detect changes in time in both groups. Thus, the negative findings found in this randomized controlled trial cannot be explained by a power problem. Considering the reported treatment effect on the primary outcome measures, we believe it is very unlikely that a larger trial would detect a clinically meaningful effect.

It is of interest to note that we detected a minor placebo effect in this study. This is in accordance with observations from earlier randomized controlled clinical trials in CFS [23–25]. However, the minimal decline in fatigue severity and functional impairment during pre- and post-trial testing in both treatment groups could also be partly explained by the phenomenon regression to the mean or a Hawthorne effect.

We did not monitor patient compliance on a daily basis. During the trial, patients had an appointment by telephone or at the outpatient clinic every 2 wk. During these appointments, we assessed whether the capsules were taken as directed, and the treatment protocol for the next 2 wk was discussed with the patient. Although adherence could not be

verified fully, there is no reason to believe that lack of adherence can explain the negative findings.

In conclusion, this randomized controlled trial did not demonstrate an effect of Aclydine on biologically active IGF1, nor did it demonstrate any benefit in CFS-related outcome measures. Thus, the findings of this clinical trial do not support the use of Aclydine in the treatment for CFS.

We feel that the negative results of this trial are important for two reasons: Aclydine is expensive, so patients might be spending a lot of money on an ineffective treatment, and it is also available without prescription on the Internet, making it available to patients potentially without a doctor's oversight.

## Supporting Information

### CONSORT Checklist

Found at doi:10.1371/journal.pctr.0020019.sd001 (58 KB DOC).

### Trial Protocol

Found at doi:10.1371/journal.pctr.0020019.sd002 (262 KB DOC).

**Alternative Language Abstract S1.** Translation of Abstract into German by Andres How Ming Neuhaus

Found at doi:10.1371/journal.pctr.0020019.sd003 (12 KB DOC).

**Alternative Language Abstract S2.** Translation of Abstract into Chinese by Yong Xue

Found at doi:10.1371/journal.pctr.0020019.sd004 (162 KB PDF).

## ACKNOWLEDGMENTS

Hormonal measurements were performed by Centrum voor Medische Analyse, Herentals, Belgium. We thank all participants and the research assistants Ilja Klabbers-Helsper, Jetske Oostelbos, and Harmen Vissers for assisting in data collection, and Jan-Mathijs Schoffelen for helpful comments.

## Author Contributions

GKHT, GB, and JWMvdM designed the study, enrolled patients, participated in the statistical analysis and contributed to the writing of the paper. GKHT drafted the paper. JWMvdM dealt with the manufacturer of the drug. The grant from Optipharma was used to perform the present study.

## REFERENCES

1. Fukuda K, Straus SE, Hickie I, Sharpe MC, Dobbins JG, et al. (1994) The Chronic Fatigue Syndrome Study: A comprehensive approach to its definition and study. *International Chronic Fatigue Syndrome Study Group. Ann Intern Med* 121: 953–959.
2. Chambers D, Bagnall AM, Hempel S, Forbes C (2006) Interventions for the treatment, management and rehabilitation of patients with chronic fatigue syndrome/myalgic encephalomyelitis: An updated systematic review. *J R Soc Med* 99: 506–520.
3. Cleare AJ (2003) The neuroendocrinology of chronic fatigue syndrome. *Endocr Rev* 24: 236–252.

4. de Boer H, Blok GJ, Van der Veen EA (1995) Clinical aspects of growth hormone deficiency in adults. *Endocr Rev* 16: 63–86.
5. Wallymahmed ME, Foy P, MacFarlane IA (1999) The quality of life of adults with growth hormone deficiency: Comparison with diabetic patients and control subjects. *Clin Endocrinol* 51: 333–338.
6. Carroll PV, Christ ER, Bengtsson BA, Carlsson L, Christiansen JS, et al. (1998) Growth hormone deficiency in adulthood and the effects of growth hormone replacement: A review. *Growth Hormone Research Society Scientific Committee. J Clin Endocrinol Metab* 83: 382–395.
7. Landis CA, Lentz MJ, Rothermel J, Riffle SC, Chapman D, et al. (2001) Decreased nocturnal levels of prolactin and growth hormone in women with fibromyalgia. *J Clin Endocrinol Metab* 86: 1672–1678.
8. Berwaerts J, Moorkens G, Abs R (1998) Secretion of growth hormone in patients with chronic fatigue syndrome. *Growth Horm IGF Res* 8: 127–129.
9. Allain TJ, Bearn JA, Coskeran P, Jones J, Checkley A, et al. (1997) Changes in growth hormone, insulin, insulin-like growth factors (IGFs), and IGF-binding protein-1 in chronic fatigue syndrome. *Biol Psychiatry* 41: 567–573.
10. Cleare AJ, Sookdeo SS, Jones J, O'Keane V, Meill JP (2000) Integrity of the GH/IGF system is maintained in patients with chronic fatigue syndrome. *J Clin Endocrinol Metab* 85: 1433–1439.
11. Buchwald D, Umali J, Stene M (1996) Insulin-like growth factor-1 (somatomedin C) levels in chronic fatigue syndrome and fibromyalgia. *J Rheumatol* 23: 739–742.
12. Bennett AL, Mayes DM, Fagioli LR, Guerriero R, Komaroff AL (1997) Somatomedin C (insulin-like growth factor 1) levels in patients with chronic fatigue syndrome. *J Psychiat Res* 31: 91–96.
13. Kosteka Z, Blahovec J (1999) Insulin-like growth factor binding proteins and their functions. *Endocr Regul* 33: 90–94.
14. De Becker P, Nijs J, Van Hoof E, McGregor N, De Meirleir K (2001) A double-blind, placebo controlled study of Aclydine in combination with amino acids in patients with Chronic Fatigue Syndrome [abstract]. *Alison Hunter Memorial Foundation Third International Clinical and Scientific Meeting on ME/CFS; Sydney, Australia; 30 November to 3 December 2001.*
15. Vercoulen JH, Swanink CM, Fennis JF, Galama JM, Van der Meer JW, et al. (1994) Dimensional assessment of chronic fatigue syndrome. *J Psychosom Res* 38: 383–392.
16. Beurskens AJ, Bültmann U, Kant IJ, Vercoulen JH, Bleijenberg G, et al. (2000) Fatigue among working people: Validity of a questionnaire measure. *Occup Environ Med* 57: 353–357.
17. Servaes P, Verhagen S, Bleijenberg G (2002) Determinants of chronic fatigue in disease-free breast cancer patients: A cross-sectional study. *Ann Oncol* 13: 589–598.
18. Bergner M, Bobbitt RA, Carter WB, Gilson BS (1981) The Sickness Impact Profile: Development and final revision of a health status measure. *Med Care* 19: 787–805.
19. Jacobs HM, Luttik A, Touw-Otten FW, De Melker RA (1990) De sickness impact profile: Resultaten van een valideringsonderzoek van de Nederlandse versie. *Ned Tijdschr Geneesk* 134: 1950–1954.
20. van der Werf S, Prins JB, Vercoulen JH, van der Meer JW, Bleijenberg G (2000) Identifying physical activity patterns in chronic fatigue syndrome using actigraphic assessment. *J Psychosom Res* 49: 373–379.
21. Vercoulen JH, Bazelmans E, Swanink CM, Fennis JF, Galama JM, et al. (1997) Physical activity in chronic fatigue syndrome: Assessment and its role in fatigue. *J Psychiatr Res* 31: 661–673.
22. Prins JB, Bleijenberg G, Bazelmans E, Elving LD, de Boo TM, et al. (2001) Cognitive behaviour therapy for chronic fatigue syndrome: A multicentre randomised controlled trial. *Lancet* 357: 841–847.
23. Brouwers FM, Van der Werf S, Bleijenberg G, Van der Zee L, Van der Meer JW (2002) The effect of a polynutrient supplement on fatigue and physical activity of patients with chronic fatigue syndrome: A double-blind randomized controlled trial. *QJM* 95: 677–683.
24. Vercoulen JH, Swanink CM, Zitman FG, Vreden SG, Hoofs MP, et al. (1996) Randomised, double-blind, placebo-controlled study of fluoxetine in chronic fatigue syndrome. *Lancet* 347: 858–861.
25. Cho HJ, Hotopf M, Wessely S (2005) The placebo response in the treatment of chronic fatigue syndrome: A systematic review and meta-analysis. *Psychosom Med* 67: 301–313.
